# Supplementary material for: Synergistic enhancement of photocatalytic hydrogen evolution in ZnIn2S4/CuWO4via an S-scheme heterojunction and the photothermal effect
Source: Royal Society of Chemistry journal article supplement (doi:10.1039/d4ta06654e), 2024-01-01
Supplement: d4ta06654e1.pdf [file d4ta06654e1.pdf]

## Supporting Information

### Synergistic Enhancement of Photocatalytic Hydrogen Evolution in ZnIn<sub>2</sub>S<sub>4</sub>/CuWO<sub>4</sub> via S-Scheme

#### Heterojunction and Photothermal Effect

Dafeng Zhang<sup>a</sup>, Dong Zhang<sup>b</sup>, Fuping Zhao<sup>a</sup>, Yutong Zhao<sup>a</sup>, Hengshuai Li<sup>b,\*</sup>, Junchang Liu<sup>a,\*</sup>, Xue-

Yang Ji<sup>a</sup>, Xipeng Pu<sup>a</sup>, Huayang Zhang<sup>c,\*</sup>

<sup>a</sup>School of Materials Science and Engineering, Shandong Provincial Key Laboratory of Chemical Energy Storage and Novel Cell Technology, Liaocheng University, Liaocheng, 252000, P. R. China

<sup>b</sup>School of Physics Science and Information Technology, Shandong Key Laboratory of Optical Communication Science and Technology, Liaocheng University, Liaocheng, 252000, P. R. China

<sup>c</sup>School of Chemical Engineering, The University of Adelaide, Adelaide, South Australia, 5005, Australia

\*Corresponding author:

E-mail address: lihengshuai@lcu.edu.cn (H. Li), liujunchang@lcu.edu.cn (J. Liu), huayang.zhang@adelaide.edu.au (H. Zhang)

#### 1.1. Characterizations

X-ray diffraction (XRD) patterns were obtained from a Bruker D8 Advance spectrometer (Bruker Co., Germany) using Cu-K $\alpha$  radiation. Raman spectra were recorded on a LabRAM HR Evolution. The morphologies of samples were characterized on a Gemini scanning electron microscope (SEM; Zeiss Ltd., Germany) and a JEM-2100 microscope (TEM; JEOL Ltd., Japan). The content and distribution of elements were determined using an INCA energy spectrometer (EDS; Oxford Instruments, United Kingdom). X-ray photoelectron spectroscopy (XPS) was performed using a K-Alpha system (Thermo Fisher Scientific Ltd., USA). The zeta potentials of the samples were tested on a Nano ZS Zetasizer (Malvern Co., United Kingdom). Absorbance spectra (UV-vis DRS) of samples were obtained by a UV-3600 spectrophotometer (Shimadzu, Japan). Fluorescence spectrometry (PL) for samples was measured using an FLS 920 fluorescence and phosphorescence spectrometer (Edinburgh Co., United Kingdom).

The electron spin resonance (ESR) spectra were measured on CIQTEK EPR200-Plus (CIQTEK Co., Ltd., China) with continue-wave X band frequency.

### **1.2. Photocatalytic measurement**

The photochemical measurements were performed using a standard three-electrode system on a 660E electrochemical workstation (Shanghai Chenhua Co., China), with a platinum wire as the auxiliary electrode and a saturated calomel electrode (SCE) as the reference electrode. The working electrode was prepared as follows: 10 mg photocatalyst was suspended in 1 mL isopropanol-water (4:1) solution and sonicated for 10 min, and then 30  $\mu$ L of the obtained slurry was injected into a 0.25 cm<sup>2</sup> SnO<sub>2</sub>: F (FTO) glass electrode and dried. Finally, the photocurrent, electrochemical impedance spectra (EIS) and Mott-Schottky (M-S) plots were measured under visible light in 0.1 M Na<sub>2</sub>SO<sub>4</sub> aqueous solution using a Ceaulight 300 W Xenon lamp.

### **1.3. Photocatalytic hydrogen evolution test**

The photocatalytic hydrogen evolution experiments were carried out in a 250 mL sealed quartz reactor with a constant temperature system of 6 °C. The procedure was as follows: firstly, 20 mg of photocatalyst was dispersed into 100 mL of solution with 0.25 M Na<sub>2</sub>SO<sub>3</sub> and 0.35 M Na<sub>2</sub>S. Secondly, after sonication for 10 min and degassing for 30 min, a 300 W Xe lamp with a filter ( $\lambda > 400$  nm) was turned on to irradiate the reactor. The evolved H<sub>2</sub> was quantified every 30 min using an online gas chromatograph (CEL-SPH2N-D9, Beijing China Education Au-light Co.). In addition, the apparent quantum efficiency (AQE) at 420 (450, 500 and 600) nm under conditions of a 16 cm<sup>2</sup> irradiation area.

### **1.4. Computational details**

First-principle calculations were based on density functional theory (DFT) with CASTEP and DMol3 packages of Materials Studio. The generalized gradient approximation (GGA) was used to deal with the

electron-electron interactions, and the Perdew-Burke-Ernzerhof (PBE) function was used to deal with the exchange correlation. The thickness of the air layer was set to 15 Å to avoid the mutual influence between layers. The distance between CWO and ZIS was set to 3 Å to form a ZIS/CWO heterojunction. The Gibbs free energy  $\Delta G_{H^*}$  was calculated to evaluate the computational high-throughput screening of photocatalytic materials for H<sub>2</sub> evolution:

$$\Delta G_{H^*} = \Delta E_H + \Delta E_{ZPE} - T\Delta S_H, \Delta E_H = E_{H^*} - E_{(catalyst)} - \frac{1}{2}E_H$$

where  $\Delta E_H$  represents the hydrogen adsorption energy, where  $E_{H^*}$ ,  $E_{(catalyst)}$  and  $E_H$  are the energies for the H\* adsorption on catalyst surface, catalyst, and hydrogen, respectively;  $\Delta E_{ZPE}$  represents the change in zero-point energy; T is the absolute temperature (298.15 K), and  $\Delta S_H$  denotes the change of entropy.

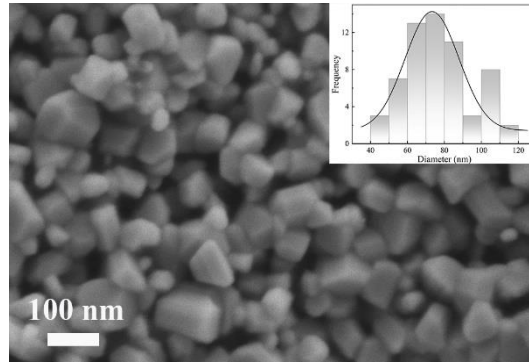

**Fig. S1.** SEM images and diameter distribution histogram of CWO.

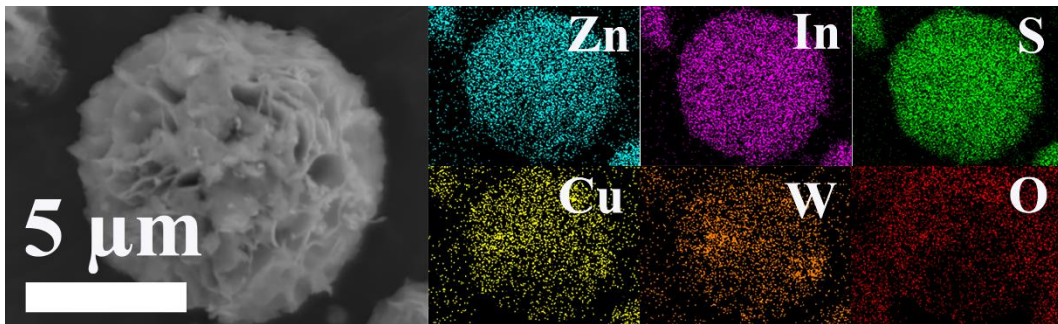

**Fig. S2.** (a) EDS spectrum of ZIS/CWO-3.

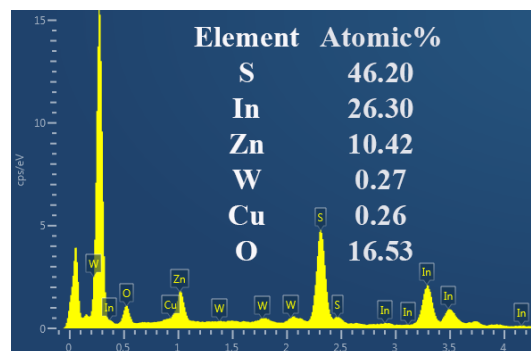

**Fig. S3.** Elemental mapping of ZIS/CWO-3

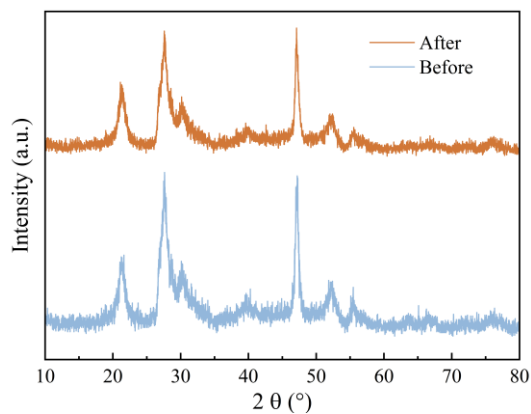

**Fig. S4.** XRD patterns of ZIS/CWO-3 before and after the photocatalysis.

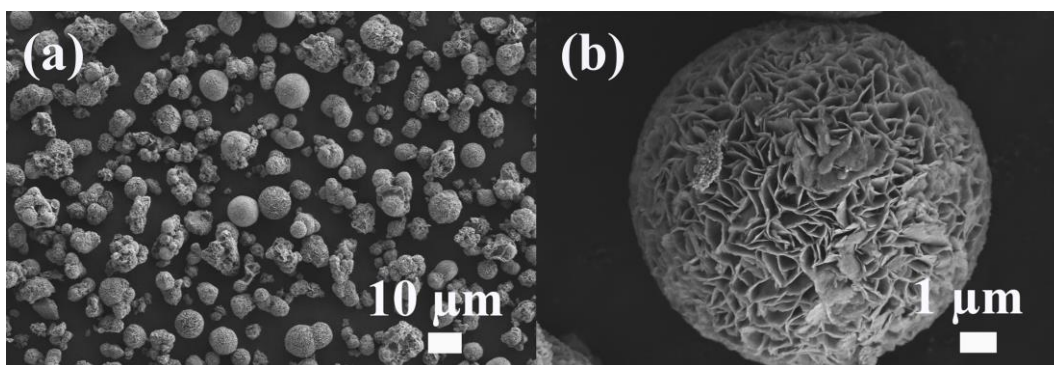

**Fig. S5.** SEM image of ZIS/CWO-3 after the photocatalytic reaction.

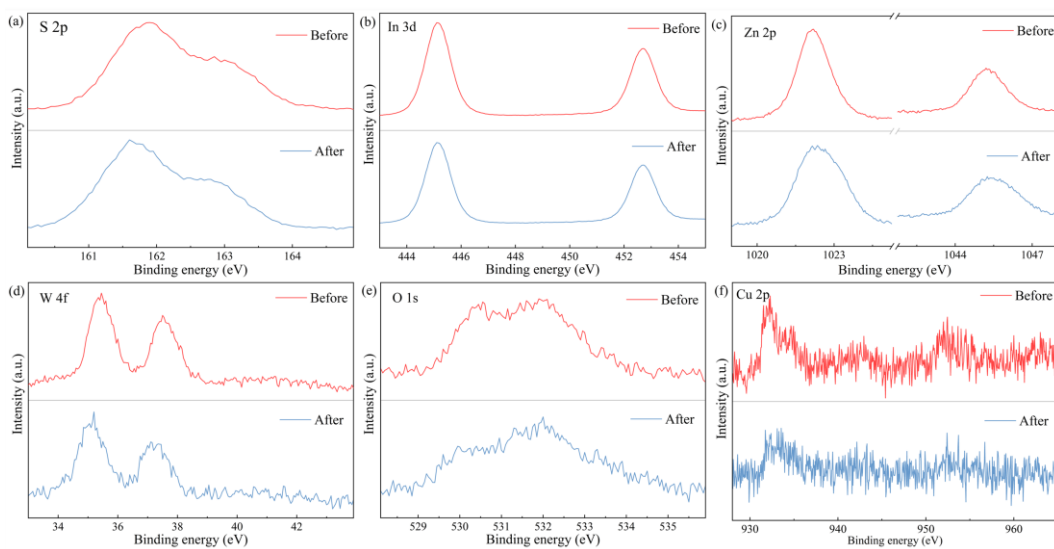

**Fig. S6.** XPS spectra of ZIS/CWO-3 before and after photocatalytic reaction. (a) S 2p, (b) In 3d, (c) Zn 2p (d) W 4f, (e) O 1 and (f) Cu 2p.

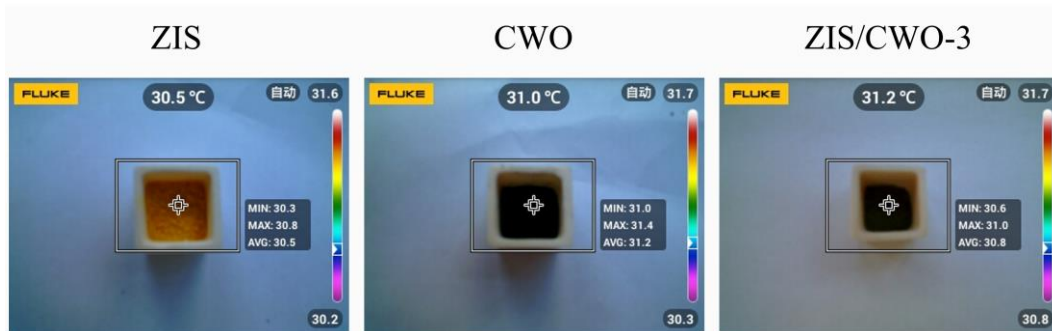

Fig. S7. Temperature mapping images of different samples at the initial moment.

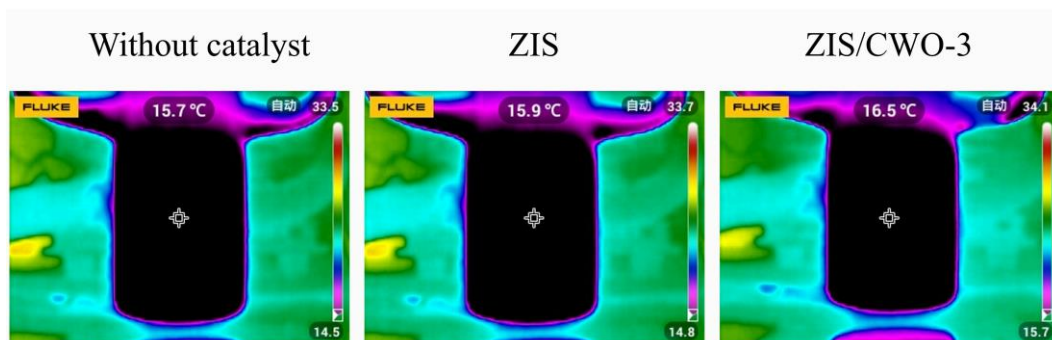

Fig. S8. Temperature mapping images of different reaction systems at the initial moment.

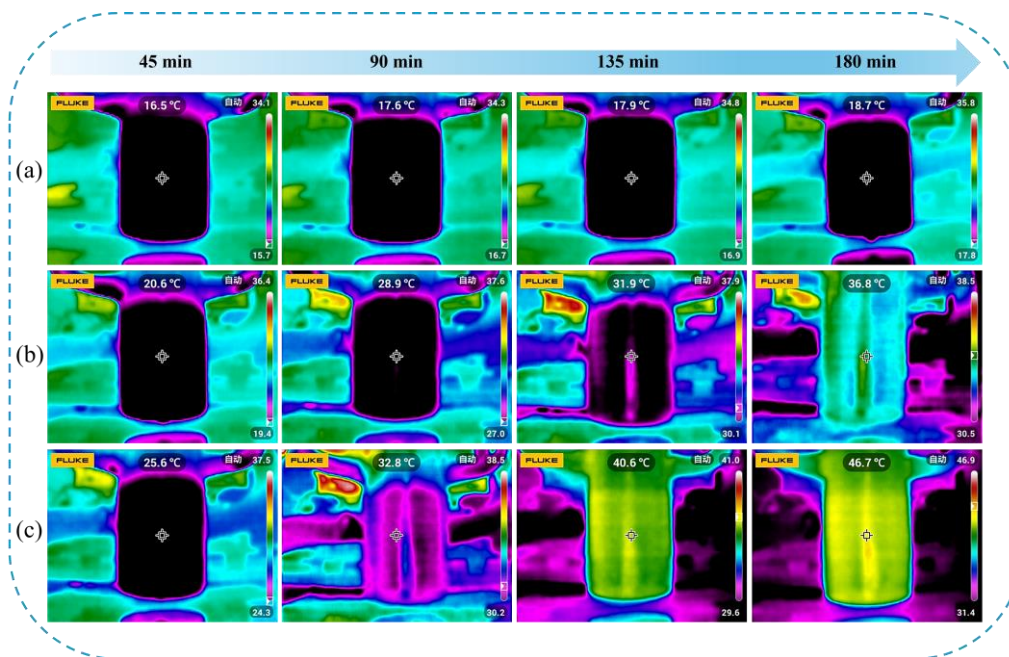

Fig. S9. Temperature mapping images under 300 W xenon lamp irradiation during the photothermal-assisted photocatalytic H<sub>2</sub> evolution for (a) without catalyst, (b) ZIS and (c) ZIS/CWO-3.

As shown in Fig. S10, we clarified the contributions of the heterojunction and photothermal effects by comparing the hydrogen evolution rates of ZIS/CWO-3 under different conditions: in the presence or absence of heterojunction formation, and with or without controlling the temperature to eliminate the photothermal effect. The sample that consisted of a simple physical mixture of ZIS and CWO was denoted as ZIS/CWO-Mix. To suppress the photothermal effect, an external water circulation at 10 °C was applied, denoted as ZIS/CWO-Tem. The hydrogen evolution activity was found to be very low when ZIS and CWO did not form a heterojunction. When the temperature was controlled to minimize the photothermal effect, the presence of the heterojunction still resulted in an 11.13-fold increase in the hydrogen evolution rate, whereas the photothermal effect alone led to a 9.63-fold improvement. Therefore, in the integrated ZIS/CWO-3 system, the heterojunction played a more significant role in enhancing photocatalytic H<sub>2</sub> evolution compared to the photothermal effect.

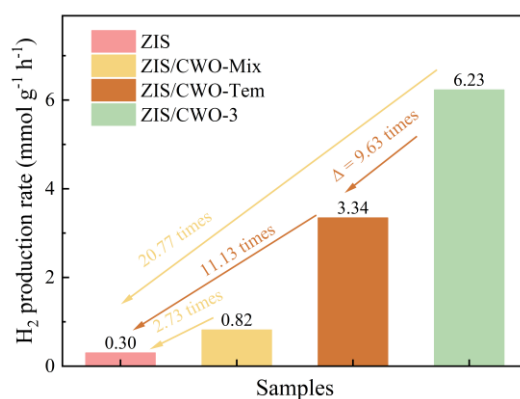

**Fig. S10.** Comparison of the effects of heterojunction formation and photothermal enhancement on the photocatalytic H<sub>2</sub> evolution activity of ZIS.

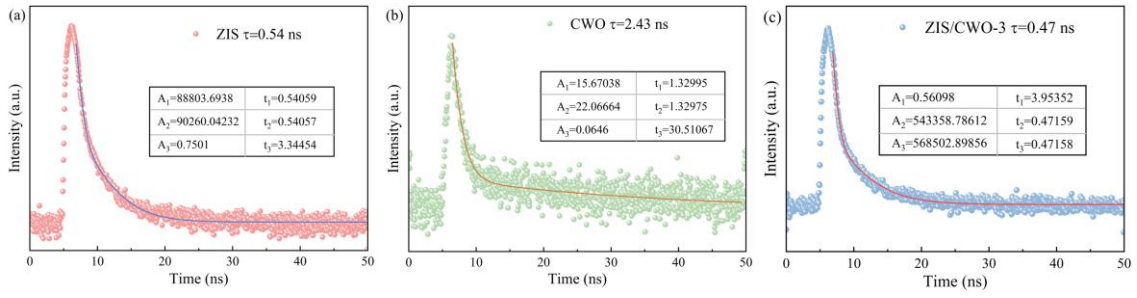

**Fig. S11.** TRPL spectrum of (a) ZIS, (b)CWO, and (c) ZIS/CWO-3.

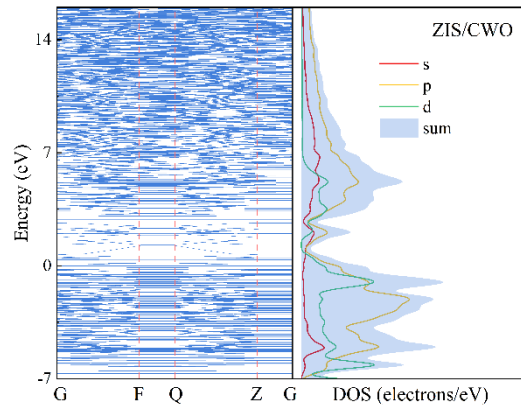

**Fig. S12.** Band structures and DOS of ZIS/CWO heterojunction.

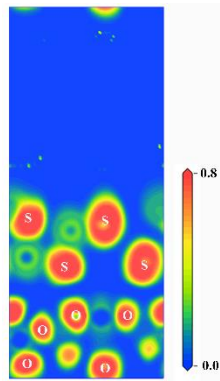

**Fig. S13.** ELF of ZIS/CWO heterojunction.



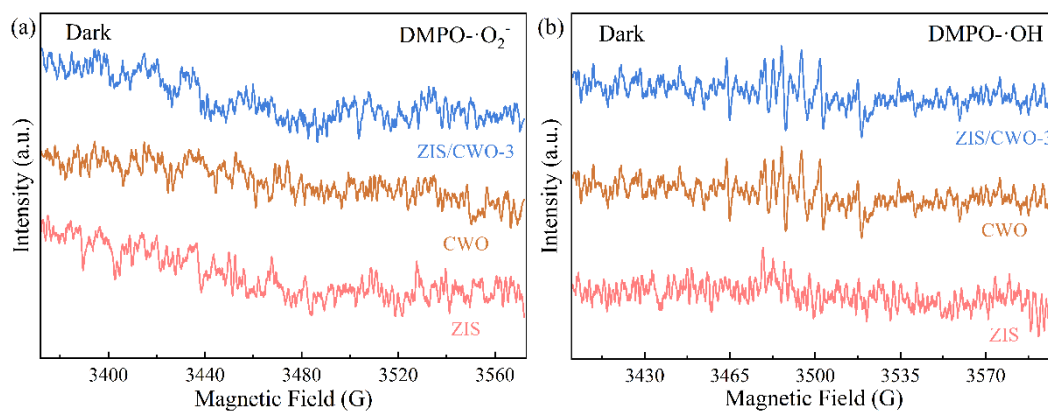

**Fig. S14.** (a) DMPO- $\cdot\text{O}_2^-$  ESR spectra and (b) DMPO- $\cdot\text{OH}$  ESR spectra under dark.

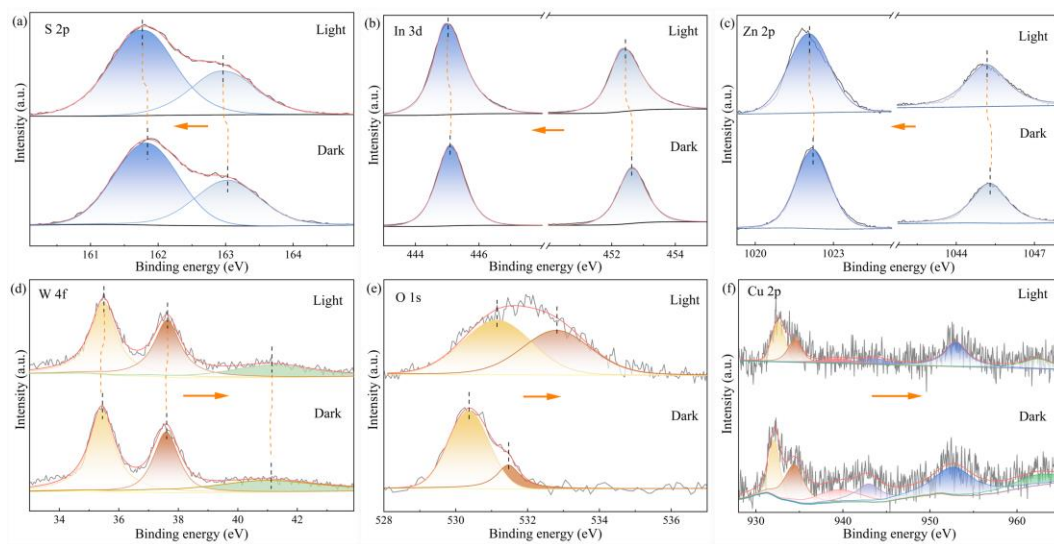

**Fig. S15.** In-situ irradiated high-resolution XPS spectra of ZIS/CWO-3 before and after light irradiation: (a) S 2p, (b) In 3d, (c) Zn 2p (d) W 4f, (e) O 1 and (f) Cu 2p.

**Table S1.** Comparison of the photocatalytic H<sub>2</sub> evolution activity for ZIS/CWO-3 with other ZIS-based photocatalysts.

| Photocatalyst                       | Reactant solution                                                      | Light source               | Activity<br>(mmol h <sup>-1</sup> g <sup>-1</sup> ) | Reference |
|-------------------------------------|------------------------------------------------------------------------|----------------------------|-----------------------------------------------------|-----------|
| CWO/ZIS                             | 0.35 M Na <sub>2</sub> S and<br>0.25 M Na <sub>2</sub> SO <sub>3</sub> | 300 W Xe lamp<br>(>400 nm) | 6.23                                                | This work |
| SnSe/ZIS                            | 10 vol% TEOA                                                           | 300 W Xe lamp<br>(>400 nm) | 5.06                                                | [1]       |
| Ni(OH) <sub>2</sub> /ZIS            | 10 vol% Lactic<br>acid                                                 | 300 W Xe lamp<br>(>420 nm) | 4.43                                                | [2]       |
| MoS <sub>2</sub> /ZIS               | 0.35 M Na <sub>2</sub> S and<br>0.25 M Na <sub>2</sub> SO <sub>3</sub> | 300 W Xe lamp<br>(>400 nm) | 3.89                                                | [3]       |
| FeWO <sub>4</sub> /ZIS              | 0.35 M Na <sub>2</sub> S and<br>0.25 M Na <sub>2</sub> SO <sub>3</sub> | 300 W Xe lamp<br>(>400 nm) | 3.53                                                | [4]       |
| CuInS <sub>2</sub> /ZIS             | 0.35 M Na <sub>2</sub> S and<br>0.25 M Na <sub>2</sub> SO <sub>3</sub> | 300 W Xe lamp<br>(>420 nm) | 3.43                                                | [5]       |
| UiO-66/ZIS                          | 15 vol% TEOA                                                           | 300 W Xe lamp<br>(>400 nm) | 3.06                                                | [6]       |
| Ti <sub>2</sub> C <sub>3</sub> /ZIS | 0.05 M Na <sub>2</sub> S and<br>0.05 M Na <sub>2</sub> SO <sub>3</sub> | 300 W Xe lamp<br>(>400 nm) | 2.60                                                | [7]       |
| ReS <sub>2</sub> /ZIS               | 10 vol% TEOA                                                           | 300 W Xe lamp<br>(>420 nm) | 1.86                                                | [8]       |
| LaNiO <sub>3</sub> /ZIS             | 10 vol% TEOA                                                           | 300 W Xe lamp<br>(>400 nm) | 1.60                                                | [9]       |

**Table S2.** Comparison of the photocatalytic H<sub>2</sub> evolution activity for ZIS/CWO-3 with other photothermal photocatalysts.

| Photocatalyst                         | Reactant solution                                                      | Light source               | Activity<br>(mmol h <sup>-1</sup> g <sup>-1</sup> ) | Reference |
|---------------------------------------|------------------------------------------------------------------------|----------------------------|-----------------------------------------------------|-----------|
| Co <sub>9</sub> S <sub>8</sub> @ZIS   | 20 vol% TEOA                                                           | 300 W Xe lamp<br>(>400 nm) | 6.25                                                | [10]      |
| CWO/ZIS                               | 0.35 M Na <sub>2</sub> S and<br>0.25 M Na <sub>2</sub> SO <sub>3</sub> | 300 W Xe lamp<br>(>400 nm) | 6.23                                                | This work |
| FeSe <sub>2</sub> /ZIS                | 10 vol% TEOA                                                           | 300 W Xe lamp<br>(>400 nm) | 5.78                                                | [11]      |
| SnSe/ZIS                              | 10 vol% TEOA                                                           | 300 W Xe lamp<br>(>400 nm) | 5.66                                                | [12]      |
| FeS <sub>2</sub> @ZIS                 | 10 vol% TEOA                                                           | 300 W Xe lamp<br>(>400 nm) | 5.02                                                | [13]      |
| Cu <sub>2-x</sub> S@ZIS               | 10 vol% lactic acid                                                    | 300 W Xe lamp<br>(>420 nm) | 4.65                                                | [14]      |
| Co <sub>3</sub> O <sub>4</sub> @ZIS   | 20 vol% TEOA                                                           | 300 W Xe lamp<br>(>400 nm) | 4.52                                                | [15]      |
| NiCo <sub>2</sub> O <sub>4</sub> /ZIS | 0.35 M Na <sub>2</sub> S and<br>0.25 M Na <sub>2</sub> SO <sub>3</sub> | 300 W Xe lamp<br>(>400 nm) | 4.51                                                | [16]      |
| NiCo <sub>2</sub> S <sub>4</sub> /ZIS | 0.1M ascorbic acid                                                     | 300 W Xe lamp<br>(>420 nm) | 1.97                                                | [17]      |

## References:

- [1] C. Du, B. Yan, and G. Yang, Promoting photocatalytic hydrogen evolution by introducing hot islands: SnSe nanoparticles on ZnIn<sub>2</sub>S<sub>4</sub> monolayer. *Chem. Eng. J.* 404 (2021) 126477. DOI: 10.1016/j.cej.2020.126477.
- [2] Z. Guo, H.X. Hou, J.Y. Zhang, P.L. Cai, and J. Lin, Prominent roles of Ni(OH)<sub>2</sub> deposited on ZnIn<sub>2</sub>S<sub>4</sub> microspheres in efficient charge separation and photocatalytic H<sub>2</sub> evolution. *RSC Adv.* 11 (2021) 12442-12448. DOI: 10.1039/d1ra01648b.
- [3] Z. Zhang, L. Huang, J. Zhang, F. Wang, Y. Xie, X. Shang, Y. Gu, H. Zhao, and X. Wang, In situ constructing interfacial contact MoS<sub>2</sub>/ZnIn<sub>2</sub>S<sub>4</sub> heterostructure for enhancing solar photocatalytic hydrogen evolution. *Appl. Catal. B.-Environ.* 233 (2018) 112-119. DOI: 10.1016/j.apcatb.2018.04.006.
- [4] D. Kong, X. Hu, J. Geng, Y. Zhao, D. Fan, Y. Lu, W. Geng, D. Zhang, J. Liu, H. Li, and X. Pu, Growing ZnIn<sub>2</sub>S<sub>4</sub> nanosheets on FeWO<sub>4</sub> flowers with p-n heterojunction structure for efficient photocatalytic H<sub>2</sub> production. *Appl. Surf. Sci.* 591 (2022) 153256. DOI: 10.1016/j.apsusc.2022.153256.
- [5] Z. Guan, J. Pan, Q. Li, G. Li, and J. Yang, Boosting Visible-Light Photocatalytic Hydrogen Evolution with an Efficient CuInS<sub>2</sub>/ZnIn<sub>2</sub>S<sub>4</sub> 2D/2D Heterojunction. *ACS Sustain. Chem. Eng.* 7 (2019) 7736-7742. DOI: 10.1021/acssuschemeng.8b06587.
- [6] X. Peng, L. Ye, Y. Ding, L. Yi, C. Zhang, and Z. Wen, Nanohybrid photocatalysts with ZnIn<sub>2</sub>S<sub>4</sub> nanosheets encapsulated UiO-66 octahedral nanoparticles for visible-light-driven hydrogen generation. *Appl. Catal. B.-Environ.* 260 (2020) 118152. DOI: 10.1016/j.apcatb.2019.118152.
- [7] Y. Chen, Y. Ge, C. Wu, H. Tang, X. Luo, J. He, L. Jiang, Z. Yan, and J. Wang, Facile Synthesis of 2D/2D Ti(2)C(3)/ZnIn(2)S(4) Heterostructure for Enhanced Photocatalytic Hydrogen Generation. *Int. J. Mol. Sci.* 24 (2023). DOI: 10.3390/ijms24043936.
- [8] X. Xiong, A. Yan, X. Zhang, F. Huang, Z. Li, Z. Zhang, and H. Weng, ReS<sub>2</sub>/ZnIn<sub>2</sub>S<sub>4</sub> heterojunctions

with enhanced visible-light-driven hydrogen evolution performance for water splitting. *J. Alloy. Compd.* 873 (2021) 159850. DOI: 10.1016/j.jallcom.2021.159850.

[9] Z. Wang, B. Su, J. Xu, Y. Hou, and Z. Ding, Direct Z-scheme ZnIn<sub>2</sub>S<sub>4</sub>/LaNiO<sub>3</sub> nanohybrid with enhanced photocatalytic performance for H<sub>2</sub> evolution. *Int. J. Hydrogen Energ.* 45 (2020) 4113-4121. DOI: 10.1016/j.ijhydene.2019.12.077.

[10] S. Wang, B.Y. Guan, X. Wang, and X. Lou, Formation of Hierarchical Co(9)S(8)@ZnIn(2)S(4) Heterostructured Cages as an Efficient Photocatalyst for Hydrogen Evolution. *J. Am. Chem. Soc.* 140 (2018) 15145-15148. DOI: 10.1021/jacs.8b07721.

[11] X. Liu, S. Wang, J. Cao, J. Yu, J. Dong, Y. Zhao, F. Zhao, D. Zhang, and X. Pu, Anchoring ZnIn<sub>2</sub>S<sub>4</sub> nanosheets on cross-like FeSe<sub>2</sub> to construct photothermal-enhanced S-scheme heterojunction for photocatalytic H<sub>2</sub> evolution. *J. Colloid Interf. Sci.* 673 (2024) 463-474. DOI: 10.1016/j.jcis.2024.06.106.

[12] C. Du, B. Yan, and G. Yang, Promoting photocatalytic hydrogen evolution by introducing hot islands: SnSe nanoparticles on ZnIn<sub>2</sub>S<sub>4</sub> monolayer. *Chemical engineering journal (Lausanne, Switzerland : 1996)* 404 (2021) 126477. DOI: 10.1016/j.cej.2020.126477.

[13] K. Chen, Y. Shi, P. Shu, Z. Luo, W. Shi, and F. Guo, Construction of core - shell FeS<sub>2</sub>@ZnIn<sub>2</sub>S<sub>4</sub> hollow hierarchical structure S-scheme heterojunction for boosted photothermal-assisted photocatalytic H<sub>2</sub> production. *Chemical engineering journal (Lausanne, Switzerland : 1996)* 454 (2023) 140053. DOI: 10.1016/j.cej.2022.140053.

[14] Y.C. Wang, M.J. Liu, C.X. Wu, J.P. Gao, M. Li, Z.P. Xing, Z.Z. Li, and W. Zhou, Hollow Nanoboxes Cu<sub>2-x</sub>S@ZnIn<sub>2</sub>S<sub>4</sub> Core-Shell S-Scheme Heterojunction with Broad-Spectrum Response and Enhanced Photothermal-Photocatalytic Performance. *Small* 18 (2022). DOI: 10.1002/sml.202202544.

[15] S. Zhang, G. Zhang, S. Wu, Z. Guan, Q. Li, and J. Yang, Fabrication of Co<sub>3</sub>O<sub>4</sub>@ZnIn<sub>2</sub>S<sub>4</sub> for

photocatalytic hydrogen evolution: Insights into the synergistic mechanism of photothermal effect and heterojunction. *J. Colloid Interf. Sci.* 650 (2023) 1974-1982. DOI: 10.1016/j.jcis.2023.07.147.

[16] B. Wang, Y.T. Si, M.Y. Du, S.D. Zhao, J. Huang, X.Y. Zhao, S.J. Wang, K.J. Lu, and M.C. Liu, Broad-spectrum response of NiCo<sub>2</sub>O<sub>4</sub>-ZnIn<sub>2</sub>S<sub>4</sub> p-n junction synergizing photothermal and photocatalytic effects for efficient H<sub>2</sub> evolution. *Catal. Sci. Technol.* 14 (2024) 4646-4654. DOI: 10.1039/d4cy00656a.

[17] Y. Guo, J. Sun, Y. Tang, X. Jia, Y. Nie, Z. Geng, C. Wang, J. Zhang, X. Tan, D. Zhong, J. Ye, and T. Yu, Efficient interfacial electron transfer induced by hollow-structured ZnIn<sub>2</sub>S<sub>4</sub> for extending hot electron lifetimes. *Energ. Environ. Sci.* 16 (2023) 3462-3473. DOI: 10.1039/D3EE01522J.
